# Supplementary material for: Prior Exposure and Toddlers’ Sleep-Related Memory for Novel Words
Source: MDPI journal article supplement (doi:10.3390/brainsci11101366), 2021-10-18

Table of Contents – FULL LIST OF MODELS AND COMPARISON BETWEEN MODELS

|                                                                                                                                                   |   |
|---------------------------------------------------------------------------------------------------------------------------------------------------|---|
| <b>Table S1</b> .....                                                                                                                             | 2 |
| <i>Ostensive Naming Group’s One-sample t-tests Comparing Fast Mapping and Retention to Chance</i> .....                                           | 2 |
| <b>Table S2</b> .....                                                                                                                             | 3 |
| <a href="#"><i>Ostensive Naming Group’s Retention Across Immediate, Afternoon, and Post-nocturnal Tests</i></a> .....                             | 3 |
| <b>Table S3</b> .....                                                                                                                             | 3 |
| <a href="#"><i>Ostensive Naming Group’s Condition by Testing Session Fixed Effects Parameter Estimates</i></a> .....                              | 3 |
| <b>Table S4</b> .....                                                                                                                             | 4 |
| <a href="#"><i>Comparison of Ostensive and Non-ostensive Naming Groups’ Retention Across Immediate, Afternoon, Post-nocturnal Tests</i></a> ..... | 4 |
| <b>Table S5</b> .....                                                                                                                             | 5 |
| <a href="#"><i>Group by Condition by Test Session Fixed Effects Parameter Estimates</i></a> .....                                                 | 5 |
| <b>Table S6</b> .....                                                                                                                             | 6 |
| <a href="#"><i>Time Intervals from Fast Mapping to Sleep Onset and the Afternoon and Post-nocturnal Tests</i></a> .....                           | 6 |
| <b>Figure S1</b> .....                                                                                                                            | 7 |
| <a href="#"><i>Ostensive Naming Group’s Heirarchical Cluster Analysis Dendogram</i></a> .....                                                     | 7 |
| <b>Figure S2</b> .....                                                                                                                            | 8 |
| <a href="#"><i>Non-ostensive Naming Group’s Heirarchical Cluster Analysis Dendogram</i></a> .....                                                 | 8 |

**Table S1***Ostensive Naming Group's One-sample t-tests Comparing Fast Mapping and Retention to Chance*

|                                        | <i>t</i> | <i>df</i> | <i>p</i> | Mean<br>Difference | 95% Confidence<br>Interval |       | Cohen's <i>d</i> |
|----------------------------------------|----------|-----------|----------|--------------------|----------------------------|-------|------------------|
|                                        |          |           |          |                    | Lower                      | Upper |                  |
| Fast mapping compared to chance (0.33) |          |           |          |                    |                            |       |                  |
| Nap                                    | 7.62     | 19        | <.001    | 0.38               | 0.28                       | 0.49  | 1.70             |
| Wake                                   | 9.52     | 19        | <.001    | 0.44               | 0.34                       | 0.54  | 2.13             |
| Retention compared to chance (0.25)    |          |           |          |                    |                            |       |                  |
| Nap                                    |          |           |          |                    |                            |       |                  |
| Immediate                              | 1.53     | 19        | .143     | 0.11               | -0.04                      | 0.27  | 0.34             |
| Afternoon                              | 3.71     | 19        | .001     | 0.24               | 0.10                       | 0.37  | 0.83             |
| Post-nocturnal                         | 3.94     | 19        | <.001    | 0.22               | 0.11                       | 0.34  | 0.88             |
| Wake                                   |          |           |          |                    |                            |       |                  |
| Immediate                              | 4.07     | 19        | <.001    | 0.21               | 0.10                       | 0.32  | 0.91             |
| Afternoon                              | 4.72     | 19        | <.001    | 0.29               | 0.16                       | 0.41  | 1.06             |
| Post-nocturnal                         | 4.33     | 19        | <.001    | 0.30               | 0.15                       | 0.45  | 0.97             |

**Table S2**

*Ostensive Naming Group's Retention Across Immediate, Afternoon, and Post-nocturnal Tests*

| Set 1: DV = retention at the 3 test sessions; IVs = ostensive naming, condition (nap, wake), test session (immediate, afternoon, post-nocturnal), and covariate habitual napping |            |                                                     |                          |                |       |           |       |       |    |            |    |          |
|----------------------------------------------------------------------------------------------------------------------------------------------------------------------------------|------------|-----------------------------------------------------|--------------------------|----------------|-------|-----------|-------|-------|----|------------|----|----------|
| Model specification                                                                                                                                                              | Model name | Fixed Effects                                       | Fixed Effects added      | Random Effects |       | Model fit |       |       |    | LRT Test   |    |          |
|                                                                                                                                                                                  |            |                                                     |                          | intercept      | slope | AIC       | BIC   | -2LL  | df | Comparison | df | $\chi^2$ |
| RE only                                                                                                                                                                          | M1         |                                                     | -                        | participant    | *     | 33.29     | 41.67 | 27.29 | 2  |            |    |          |
| FE                                                                                                                                                                               | M2         | condition                                           | condition                | participant    |       | 33.95     | 45.10 | 25.95 | 4  | M2 vs M1   | 2  | -1.34    |
| FEs                                                                                                                                                                              | M3         | condition + test session                            | test session             | participant    |       | 33.02     | 49.74 | 21.02 | 6  | M3 vs M2   | 2  | -4.93*   |
| FEs + interaction                                                                                                                                                                | M4         | condition + test session + condition × test session | condition × test session | participant    |       | 36.78     | 59.08 | 20.78 | 8  | M4 vs M3   | 2  | -0.24    |

\*not included as models failed to converge with the addition of random slopes

**Table S3**

*Ostensive Naming Group's Condition by Testing Session Fixed Effects Parameter Estimates*

| Names                      | Effect                 | Estimate | SE   | 95% Confidence Interval |       | df | t     | p      |
|----------------------------|------------------------|----------|------|-------------------------|-------|----|-------|--------|
|                            |                        |          |      | Lower                   | Upper |    |       |        |
| (Intercept)                | (Intercept)            | 0.48     | 0.03 | 0.42                    | 0.54  | 40 | 14.93 | < .001 |
| condition                  | wake - nap             | 0.08     | 0.06 | -0.05                   | 0.20  | 40 | 1.17  | .250   |
| test session 1             | linear                 | -0.00    | 0.04 | -0.07                   | 0.07  | 80 | -0.00 | .999   |
| test session 2             | quadratic              | 0.08     | 0.04 | 0.01                    | 0.15  | 80 | 2.26  | .027   |
| condition * test session 1 | wake - nap * linear    | 0.02     | 0.07 | -0.12                   | 0.16  | 80 | 0.24  | .807   |
| condition * test session 2 | wake - nap * quadratic | -0.03    | 0.07 | -0.17                   | 0.11  | 80 | -0.42 | .673   |

Table S4

*Comparison of Ostensive and Non-ostensive Naming Groups' Retention Across Immediate, Afternoon, Post-nocturnal Tests*

| Set 2: DV = retention at the 3 test sessions; IVs = group (ostensive naming, non-ostensive naming), condition (nap, wake), test session (immediate, afternoon, post-nocturnal), and covariate habitual napping |            |                                                                                                                                                           |                                     |                |       |           |        |       |    |            |    |                |
|----------------------------------------------------------------------------------------------------------------------------------------------------------------------------------------------------------------|------------|-----------------------------------------------------------------------------------------------------------------------------------------------------------|-------------------------------------|----------------|-------|-----------|--------|-------|----|------------|----|----------------|
| Model specification                                                                                                                                                                                            | Model name | Fixed Effects                                                                                                                                             | Fixed Effects added                 | Random Effects |       | Model fit |        |       |    | LRT Test   |    |                |
|                                                                                                                                                                                                                |            |                                                                                                                                                           |                                     | intercept      | slope | AIC       | BIC    | -2LL  | df | Comparison | df | X <sup>2</sup> |
| FEs + interaction                                                                                                                                                                                              | M5         | condition +<br>test session +<br>condition × test session +<br>group                                                                                      | group                               | participant    |       | 92.82     | 124.14 | 74.82 | 9  | M5 vs M4   | 1  | 54.04*         |
| FEs + interactions                                                                                                                                                                                             | M6         | condition +<br>test session +<br>condition × test session +<br>group +<br>group × condition                                                               | group × condition                   | participant    |       | 86.46     | 121.26 | 66.46 | 10 | M6 vs M5   | 1  | -8.36*         |
| FEs + interactions                                                                                                                                                                                             | M7         | condition +<br>test session +<br>condition × test session +<br>group +<br>group × condition +<br>group × test session                                     | group × test session                | participant    |       | 78.97     | 120.73 | 54.96 | 12 | M7 vs M6   | 2  | -11.50*        |
| FEs + interactions                                                                                                                                                                                             | M8         | condition +<br>test session +<br>condition × test session +<br>group +<br>group × condition +<br>group × test session<br>group × condition × test session | group × condition<br>× test session | participant    |       | 81.81     | 130.54 | 53.82 | 14 | M8 vs M7   | 2  | -1.14          |

Table S5

*Group by Condition by Test Session Fixed Effects Parameter Estimates*

| Names                             | Effect                                 | Estimate | SE   | 95% Confidence Interval |       | df     | t     | p      |
|-----------------------------------|----------------------------------------|----------|------|-------------------------|-------|--------|-------|--------|
|                                   |                                        |          |      | Lower                   | Upper |        |       |        |
| (Intercept)                       | (Intercept)                            | 0.43     | 0.02 | 0.39                    | 0.47  | 40.21  | 19.61 | < .001 |
| condition                         | wake - nap                             | -0.05    | 0.04 | -0.13                   | 0.03  | 125.03 | -1.31 | .193   |
| test session1                     | linear                                 | -0.03    | 0.03 | -0.08                   | 0.03  | 190.61 | -0.95 | .342   |
| test session2                     | quadratic                              | -0.01    | 0.03 | -0.07                   | 0.04  | 190.61 | -0.48 | .630   |
| group                             | non_ost - ost                          | -0.11    | 0.03 | -0.17                   | -0.04 | 221.36 | -3.12 | .002   |
| condition * test session1         | wake - nap * linear                    | 0.02     | 0.06 | -0.09                   | 0.13  | 190.61 | 0.38  | .704   |
| condition * test session2         | wake - nap * quadratic                 | -0.09    | 0.06 | -0.21                   | 0.02  | 190.61 | -1.61 | .110   |
| condition * group                 | wake - nap * non_ost - ost             | -0.22    | 0.07 | -0.37                   | -0.08 | 207.76 | -2.99 | .003   |
| test session1 * group             | linear * non_ost - ost                 | -0.05    | 0.06 | -0.17                   | 0.06  | 190.61 | -0.95 | .342   |
| test session2 * group             | quadratic * non_ost - ost              | -0.19    | 0.06 | -0.30                   | -0.08 | 190.61 | -3.32 | .001   |
| condition * test session1 * group | wake - nap * linear * non_ost - ost    | 0.01     | 0.12 | -0.22                   | 0.23  | 190.61 | 0.07  | .941   |
| condition * test session2 * group | wake - nap * quadratic * non_ost - ost | -0.12    | 0.12 | -0.35                   | 0.10  | 190.61 | -1.07 | .284   |

**Table S6***Time Intervals from Fast Mapping to Sleep Onset and the Afternoon and Post-nocturnal Tests*

|                       | Fast Mapping to First<br>Sleep Onset |           | Fast Mapping to<br>Afternoon Test |           | Fast Mapping to Post-<br>nocturnal Test |           |
|-----------------------|--------------------------------------|-----------|-----------------------------------|-----------|-----------------------------------------|-----------|
|                       | <i>M</i>                             | <i>SD</i> | <i>M</i>                          | <i>SD</i> | <i>M</i>                                | <i>SD</i> |
| Ostensive             |                                      |           |                                   |           |                                         |           |
| Nap Condition (mins)  | 145.15                               | 78.94     | 290.35                            | 49.30     | 1304.65                                 | 53.12     |
| (hours)               | (2.42)                               | (1.32)    | (4.84)                            | (0.82)    | (21.74)                                 | (0.89)    |
| Wake Condition (mins) | 439.70                               | 170.21    | 220.65                            | 49.07     | 1324.10                                 | 104.45    |
| (hours)               | (7.33)                               | (2.84)    | (3.68)                            | (0.82)    | (22.07)                                 | (1.74)    |
| Non-ostensive         |                                      |           |                                   |           |                                         |           |
| Nap Condition (mins)  | 90.40                                | 46.48     | 220.80                            | 26.69     | 1259.70                                 | 55.12     |
| (hours)               | (1.51)                               | (0.77)    | (3.68)                            | (0.44)    | (21.00)                                 | (0.92)    |
| Wake Condition (mins) | 479.30                               | 116.35    | 206.30                            | 39.10     | 1294.80                                 | 48.12     |
| (hours)               | (7.99)                               | (1.94)    | (3.44)                            | (0.65)    | (21.58)                                 | (0.80)    |

Figure S1

*Ostensive Naming Group's Hierarchical Cluster Analysis Dendrogram*

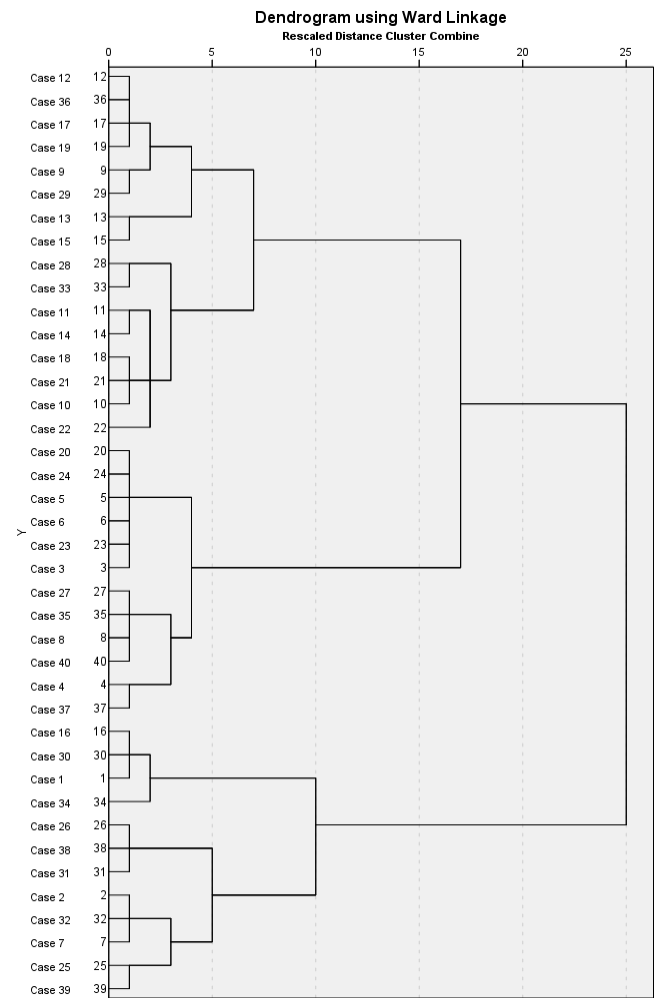

Figure S2

Non-ostensive Naming Group's Hierarchical Cluster Analysis Dendrogram

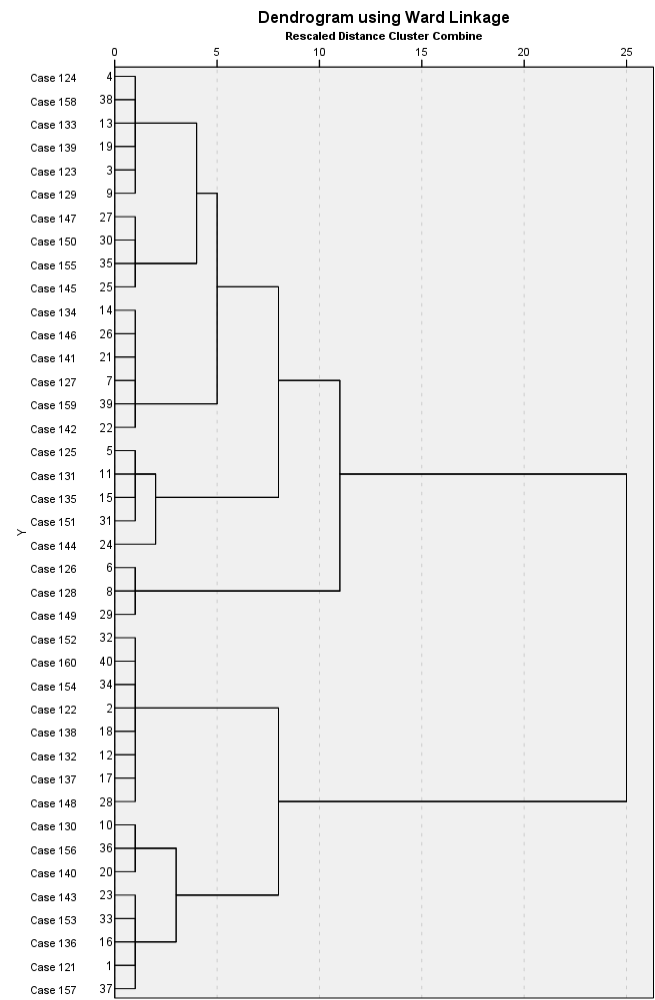

Supplement: s1 [file s1]
